# Supplementary material
Source: PubMed Central journal article supplement (PMC7984693)
Supplement: 15-01205.pdf [file 15-01205.pdf]

**On-line Table 1: Summary of the key aspects of the RANO response criteria**

| Criterion                              | Complete Response   | Partial Response    | Stable Disease                  | Progressive Disease |
|----------------------------------------|---------------------|---------------------|---------------------------------|---------------------|
| T1-weighted post-Gd measurable disease | None                | ≥50% decrease       | <50% decrease but <25% increase | ≥25% increase       |
| T2/FLAIR                               | Stable or decreased | Stable or decreased | Stable or decreased             | Increased           |
| New lesion                             | None                | None                | None                            | Present             |
| Corticosteroids                        | None                | Stable or decreased | Stable or decreased             | NA                  |
| Clinical status                        | Stable or increased | Stable or increased | Stable or increased             | Decreased           |
| Requirement for response               | All                 | All                 | All                             | Any                 |

**Note:**—NA indicates not applicable.

**On-line Table 2: Standard brain imaging protocol**

|                         | Structural Brain MRI |           |           |            |                                        |                                                  |
|-------------------------|----------------------|-----------|-----------|------------|----------------------------------------|--------------------------------------------------|
|                         | T1 Pre-Gd            | T2        | FLAIR     | DWI        | Administer Contrast Agent <sup>a</sup> |                                                  |
|                         |                      |           |           |            | T1 Post-Gd                             | 3D T1 Volumetric (MPRAGE or SPGR)                |
| Orientation             | Axial                | Axial     | Axial     | Axial      | Axial                                  | Axial or sagittal                                |
| Plane                   | 2D                   | 2D        | 2D        | 2D-EPI     | 2D                                     | 3D                                               |
| TE (ms)                 | 14                   | 85        | 125       | Minimum    | 14                                     | 3–4                                              |
| TR (ms)                 | 650                  | 3000      | 11,000    | Minimum    | 650                                    | 8                                                |
| TI (ms)                 | NA                   | NA        | 2800      | NA         | NA                                     | 900 (Philips Healthcare or Siemens) <sup>b</sup> |
| Flip angle (excitation) | 90°                  | 90°       | 90°       | 90°        | 90°                                    | 10°                                              |
| Flip angle (refocusing) | 180°                 | 180°      | 180°      | 180°       | 180°                                   | NA                                               |
| B-value                 | NA                   | NA        | NA        | 0 and 1000 | NA                                     | NA                                               |
| Section thickness (mm)  | ≤4.0                 | ≤4.0      | ≤4.0      | ≤4.0       | ≤4.0                                   | 1                                                |
| Section gap (mm)        | ≤4.0                 | ≤4.0      | ≤4.0      | ≤4.0       | ≤4.0                                   | NA                                               |
| Matrix                  | 256 × 180            | 256 × 180 | 256 × 180 | 128 × 128  | 256 × 180                              | 256 × 256 (sagittal)<br>256 × 180 (axial)        |
| FOV (mm)                | 230                  | 230       | 230       | 230        | 230                                    | 256                                              |
| NEX/NSA                 | 1–2                  | 1–2       | 1–2       | 1–2        | 1–2                                    | 1                                                |
| No. of sections         | 32–42                | 32–42     | 32–42     | 32–42      | 32–42                                  | 128–160                                          |
| Gd-DTPA <sup>c</sup>    | No                   | No        | No        | No         | Yes; 0.2 mmol/kg                       | Yes; 0.2 mmol/kg                                 |

**Note:**—NSA indicates the number of acquisitions; SPGR, spoiled gradient recalled echo; NA, not applicable.

<sup>a</sup> Contrast agent must be consistent throughout the trial.

<sup>b</sup> Philips Healthcare, Best, the Netherlands; Siemens, Erlangen, Germany.

<sup>c</sup> If the patient is older than 7 years of age, nonionic agents (eg, gadobutrol) may be used with a dosage of 0.1 mmol/kg.

**On-line Table 3: Perfusion (dynamic-susceptibility contrast T2) imaging parameters**

| Field strength           | Description |                              |         |        |                              |         |
|--------------------------|-------------|------------------------------|---------|--------|------------------------------|---------|
|                          | 1.5T        |                              |         | 3T     |                              |         |
| Manufacturer             | GE          | Philips                      | Siemens | GE     | Philips                      | Siemens |
| Sequence                 | EPI GE      | PRESTO                       | Ep2dfid | EPI GE | PRESTO                       | Ep2dfid |
| Fixed parameter value    |             |                              |         |        |                              |         |
| Matrix                   | 128         | 128                          | 128     | 128    | 128                          | 128     |
| FOV (mm)                 | 240         | 230                          | 230     | 240    | 230                          | 230     |
| Section thickness (mm)   | 5           | 4                            | 5       | 5      | 3.5                          | 5       |
| Intersection gap (mm)    | ≤1.5        | ≤0.5                         | ≤0.5    | ≤1.5   | ≤0.5                         | ≤0.5    |
| Orientation              | Axial       | Axial                        | Axial   | Axial  | Axial                        | Axial   |
| Flip angle               | 90°         | 10°                          | 90°     | 90°    | 7°                           | 90°     |
| Variable parameter value |             |                              |         |        |                              |         |
| TR (ms)                  | ≤3000       | 16                           | ≤2000   | ≤3000  | 16                           | ≤2000   |
| TE (ms)                  | 60          | 30                           | 30      | 60     | 24                           | 30      |
| Bandwidth (Hz/Px)        | ≤900        | ≤3000 (water-fat-shift ≤4.5) | ≤1400   | ≤900   | ≤3000 (water-fat-shift ≤4.5) | ≤1400   |
| NSA/NEX                  | 1           | 1                            | 1       | 1      | 1                            | 1       |
| Phase %                  | 100         | 100                          | 100     | 100    | 100                          | 100     |
| Parallel imaging         | No          | 2                            | 2       | No     | 2                            | 2       |
| No. of volumes/dynamics  | ≥60         | ≥60                          | ≥60     | ≥60    | ≥60                          | ≥60     |

**Note:**—EPI GE indicates echo planar imaging with gradient echo refocusing; NSA, number of acquisitions; PRESTO, principles of echo shifting with a train of observations; Ep2dfid, echo-planar imaging 2D free induction decay.

**On-line Table 4: Decision rules for structural imaging and diffusion/perfusion status**

| Structural MRI Review Response        | Diffusion Status         | Perfusion Status         | Combined Structural/Functional MRI Response |
|---------------------------------------|--------------------------|--------------------------|---------------------------------------------|
| Complete response                     | Unable to assess/missing | Unable to assess/missing | Complete response                           |
|                                       | Normal                   | Normal/decreased         | Complete response                           |
|                                       | Increased                | Normal/decreased         | Complete response                           |
|                                       | Unable to assess/missing | Normal/decreased         | Complete response                           |
|                                       | Decreased                | Normal/decreased         | Complete response                           |
|                                       | Decreased                | Unable to assess/missing | Complete response                           |
|                                       | Decreased                | Increased                | Progressive disease/recurrent disease       |
|                                       | Normal                   | Increased                | Progressive disease/recurrent disease       |
|                                       | Increased                | Increased                | Progressive disease/recurrent disease       |
|                                       | Unable to assess/missing | Increased                | Progressive disease/recurrent disease       |
| Partial response                      | Unable to assess/missing | Unable to assess/missing | Partial response                            |
|                                       | Normal                   | Normal/decreased         | Partial response                            |
|                                       | Increased                | Normal/decreased         | Partial response                            |
|                                       | Unable to assess/missing | Normal/decreased         | Partial response                            |
|                                       | Decreased                | Normal/decreased         | Stable disease                              |
|                                       | Decreased                | Unable to assess/missing | Stable disease                              |
|                                       | Decreased                | Increased                | Progressive disease/recurrent disease       |
|                                       | Normal                   | Increased                | Progressive disease/recurrent disease       |
|                                       | Increased                | Increased                | Progressive disease/recurrent disease       |
|                                       | Unable to assess/missing | Increased                | Progressive disease/recurrent disease       |
| Stable disease                        | Unable to assess/missing | Unable to assess/missing | Stable disease                              |
|                                       | Normal                   | Normal/decreased         | Stable disease                              |
|                                       | Increased                | Normal/decreased         | Stable disease                              |
|                                       | Unable to assess/missing | Normal/decreased         | Stable disease                              |
|                                       | Decreased                | Normal/decreased         | Stable disease                              |
|                                       | Decreased                | Unable to assess/missing | Stable disease                              |
|                                       | Decreased                | Increased                | Progressive disease/recurrent disease       |
|                                       | Normal                   | Increased                | Progressive disease/recurrent disease       |
|                                       | Increased                | Increased                | Progressive disease/recurrent disease       |
|                                       | Unable to assess/missing | Increased                | Progressive disease/recurrent disease       |
| No change                             | Unable to assess/missing | Unable to assess/missing | No change                                   |
|                                       | Normal                   | Normal/decreased         | No change                                   |
|                                       | Increased                | Normal/decreased         | No change                                   |
|                                       | Unable to assess/missing | Normal/decreased         | No change                                   |
|                                       | Decreased                | Normal/decreased         | No change                                   |
|                                       | Decreased                | Unable to assess/missing | No change                                   |
|                                       | Decreased                | Increased                | Progressive disease/recurrent disease       |
|                                       | Normal                   | Increased                | Progressive disease/recurrent disease       |
|                                       | Increased                | Increased                | Progressive disease/recurrent disease       |
|                                       | Unable to assess/missing | Increased                | Progressive disease/recurrent disease       |
| Progressive disease/recurrent disease | Unable to assess/missing | Unable to assess/missing | Progressive disease/recurrent disease       |
|                                       | Normal                   | Normal/decreased         | Stable disease                              |
|                                       | Increased                | Normal/decreased         | Stable disease                              |
|                                       | Unable to assess/missing | Normal/decreased         | Stable disease                              |
|                                       | Decreased                | Normal/decreased         | Stable disease                              |
|                                       | Decreased                | Unable to assess/missing | Progressive disease/recurrent disease       |
|                                       | Decreased                | Increased                | Progressive disease/recurrent disease       |
|                                       | Normal                   | Increased                | Progressive disease/recurrent disease       |
|                                       | Increased                | Increased                | Progressive disease/recurrent disease       |
|                                       | Unable to assess/missing | Increased                | Progressive disease/recurrent disease       |

Continued on next page

**On-line Table 4: Continued**

| Structural MRI Review Response | Diffusion Status         | Perfusion Status         | Combined Structural/Functional MRI Response |
|--------------------------------|--------------------------|--------------------------|---------------------------------------------|
| Pseudoprogression              | Unable to assess/missing | Unable to assess/missing | Pseudoprogression                           |
|                                | Normal                   | Normal/decreased         | Stable disease                              |
|                                | Increased                | Normal/decreased         | Stable disease                              |
|                                | Unable to assess/missing | Normal/decreased         | Stable disease                              |
|                                | Decreased                | Normal/decreased         | Stable disease                              |
|                                | Decreased                | Unable to assess/missing | Progressive disease/recurrent disease       |
|                                | Decreased                | Increased                | Progressive disease/recurrent disease       |
|                                | Normal                   | Increased                | Progressive disease/recurrent disease       |
|                                | Increased                | Increased                | Progressive disease/recurrent disease       |
|                                | Unable to assess/missing | Increased                | Progressive disease/recurrent disease       |
| Unable to assess               | Unable to assess/missing | Unable to assess/missing | Unable to assess                            |
|                                | Normal                   | Normal/decreased         | Stable disease                              |
|                                | Increased                | Normal/decreased         | Stable disease                              |
|                                | Unable to assess/missing | Normal/decreased         | Stable disease                              |
|                                | Decreased                | Normal/decreased         | Stable disease                              |
|                                | Decreased                | Unable to assess/missing | Stable disease                              |
|                                | Decreased                | Increased                | Progressive disease/recurrent disease       |
|                                | Normal                   | Increased                | Progressive disease/recurrent disease       |
|                                | Increased                | Increased                | Progressive disease/recurrent disease       |
|                                | Unable to assess/missing | Increased                | Progressive disease/recurrent disease       |

**On-line Table 5: Comparison of recommended sequences for Response Assessment in Neuro-Oncology criteria and the Consensus on Recommendation for a Standardized Brain Tumor Imaging Protocol<sup>4,19</sup>**

| RANO, Recommended Sequences        | Standardized Brain Tumor Imaging Protocol, Recommended Sequences |
|------------------------------------|------------------------------------------------------------------|
| Axial T1-weighted 2D               | 3D T1-weighted precontrast                                       |
| Axial T2-weighted + axial 2D FLAIR | Axial 2D FLAIR                                                   |
| DWI                                | Axial 2D DWI                                                     |
| Gadolinium injection               | Gadolinium injection                                             |
| Axial 2D T1-weighted               | Axial 2D T2-weighted                                             |
| Axial 3D T1-weighted               | 3D T1-weighted                                                   |

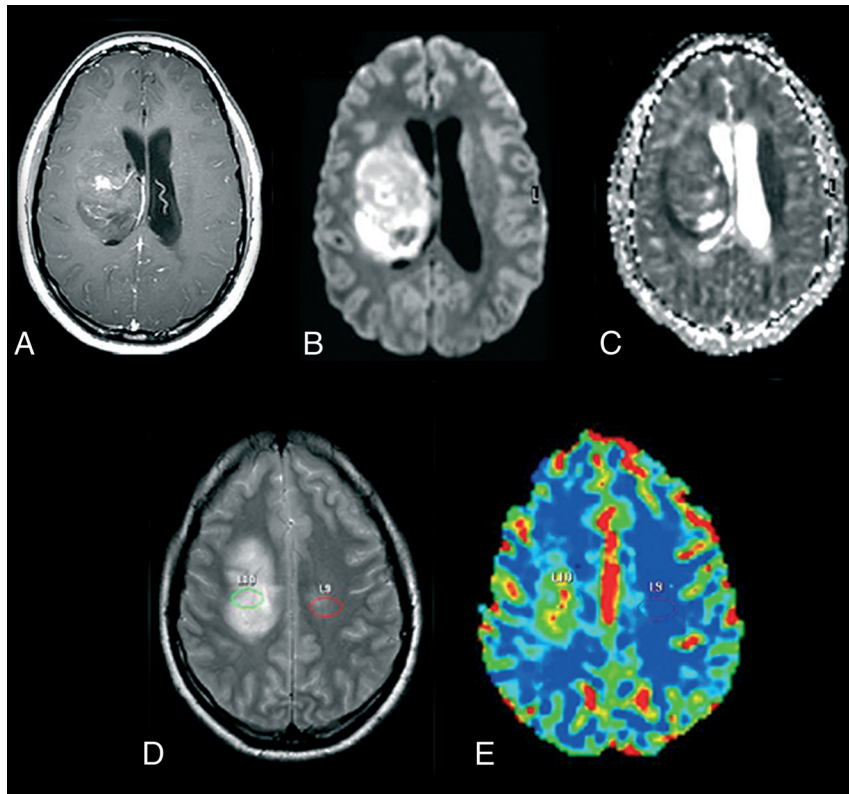

**ON-LINE FIG 1.** An example of tumor imaging by T1 postgadolinium MR imaging (A), diffusion-weighted imaging (B), apparent diffusion coefficient mapping (C), T2 MR imaging with regions of interest (D), and cerebral blood volume (E).

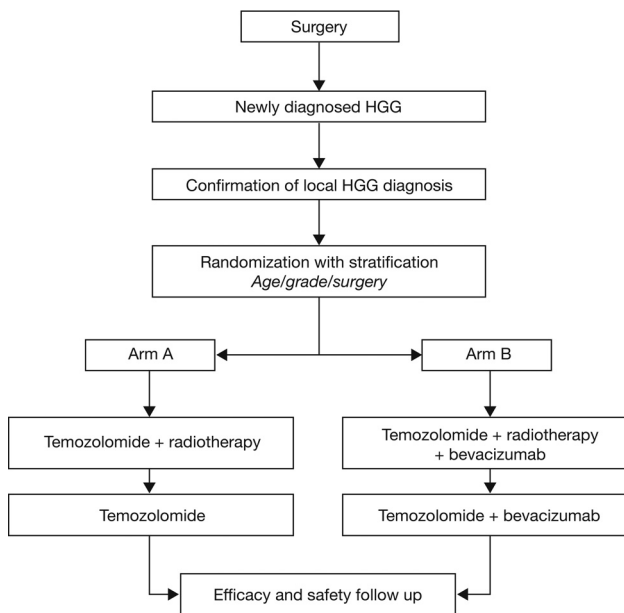

**ON-LINE FIG 2.** HERBY study design.

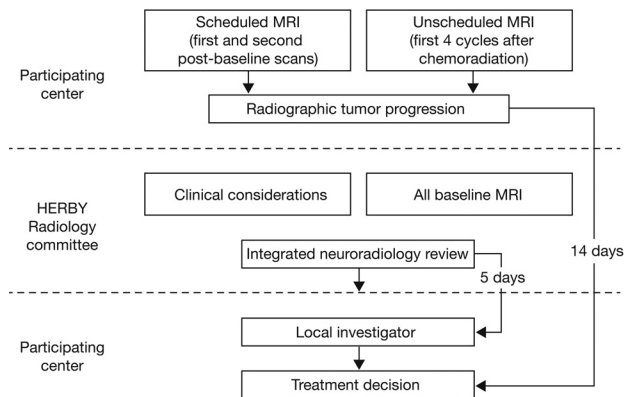

**ON-LINE FIG 3.** Algorithm to assess early progression in HERBY.
